# Supplementary material for: Fine-tuning the coordination atoms of copper redox mediators: an effective strategy for boosting the photovoltage of dye-sensitized solar cells
Source: Royal Society of Chemistry journal article supplement (doi:10.1039/c9ta02735a), 2019-01-01
Supplement: c9ta02735a1.pdf [file c9ta02735a1.pdf]

## Supplementary Information

### **Fine-tuning the coordination atoms of copper redox mediators: an effective strategy in boosting the photovoltage of dye-sensitized solar cells**

Yawei Zhao,<sup>†a</sup> Junyu Shen,<sup>†ab</sup> Ze Yu,<sup>\*a</sup> Maowei Hu,<sup>a</sup> Chong Liu,<sup>c</sup> Jiandong Fan,<sup>c</sup> Hongxian Han,<sup>d</sup> Anders Hagfeldt,<sup>e</sup> Mei Wang,<sup>\*a</sup> and Licheng Sun<sup>af</sup>

<sup>a</sup>State Key Laboratory of Fine Chemicals, Institute of Artificial Photosynthesis, DUT-KTH Joint Education and Research Center on Molecular Devices, Institute of Energy Science and Technology, Dalian University of Technology (DUT), Dalian 116024, China.

<sup>b</sup>Jiangsu Laboratory of Advanced Functional Materials, School of Chemistry and Material Engineering, Changshu Institute of Technology, Changshu 215500, China.

<sup>c</sup>Institute of New Energy Technology, College of Information Science and Technology, Jinan University, Guangzhou 510632, China.

<sup>d</sup>State Key Laboratory of Catalysis, Dalian Institute of Chemical Physics, Chinese Academy of Sciences, Dalian National Laboratory for Clean Energy, Dalian, 116023, China.

<sup>e</sup>Laboratory of Photomolecular Science, École Polytechnique Fédérale de Lausanne, CH-1015 Lausanne, Switzerland.

<sup>f</sup>Department of Chemistry, School of Engineering Sciences in Chemistry, Biotechnology and Health, KTH Royal Institute of Technology, SE-10044 Stockholm, Sweden.

<sup>†</sup> Y.Z. and J.S. contributed equally.

## Supplementary Figures and Tables

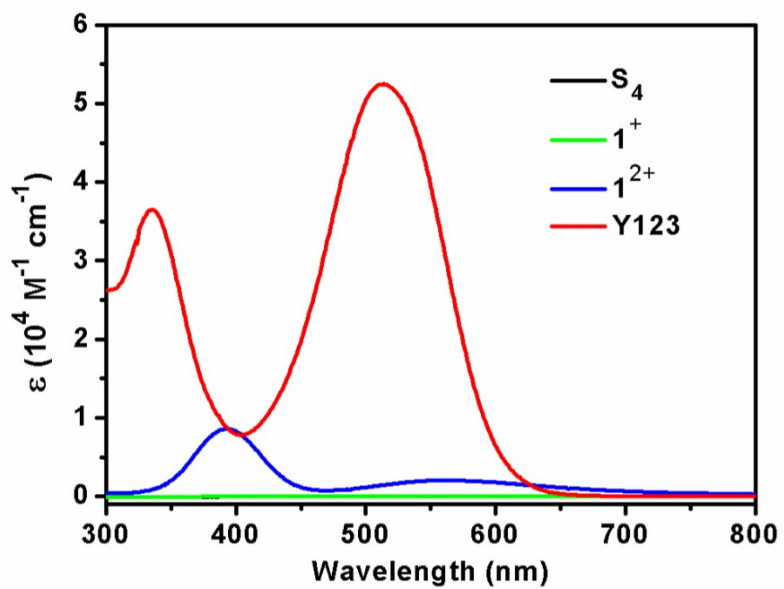

**Fig. S1** UV-vis absorption spectra of S<sub>4</sub>, 1<sup>+</sup>, 1<sup>2+</sup>, and dye Y123 in acetonitrile solutions.

Concentrations: 0.1 mM for the ligand and the copper complexes, and 0.02 mM for dye Y123.

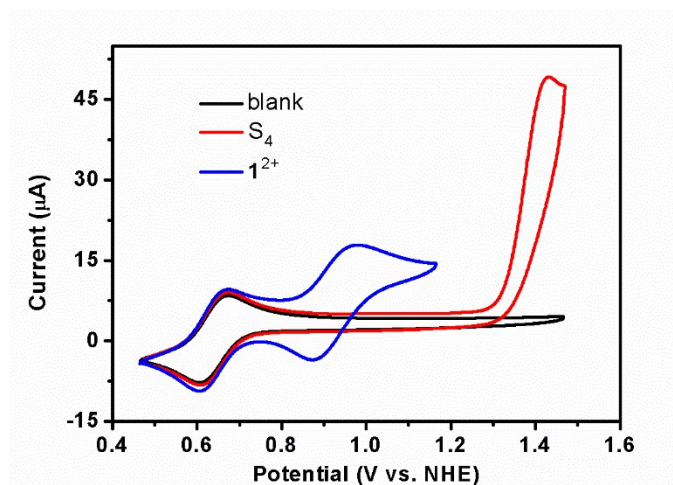

**Fig. S2** Cyclic voltammograms of  $1^{2+}$ , and  $S_4$ , as well as the blank CV with 1 mM concentration in acetonitrile containing 0.1 M  $n\text{Bu}_4\text{NPF}_6$  at a scan rate of  $50 \text{ mV s}^{-1}$ .

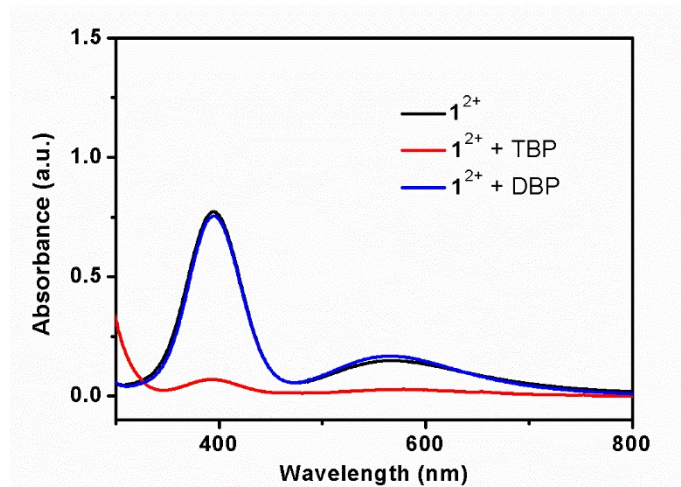

**Fig. S3** UV-vis absorption spectra of  $1^{2+}$  (0.1 mM) with excess TBP or DBP (10 equivalent) in acetonitrile.

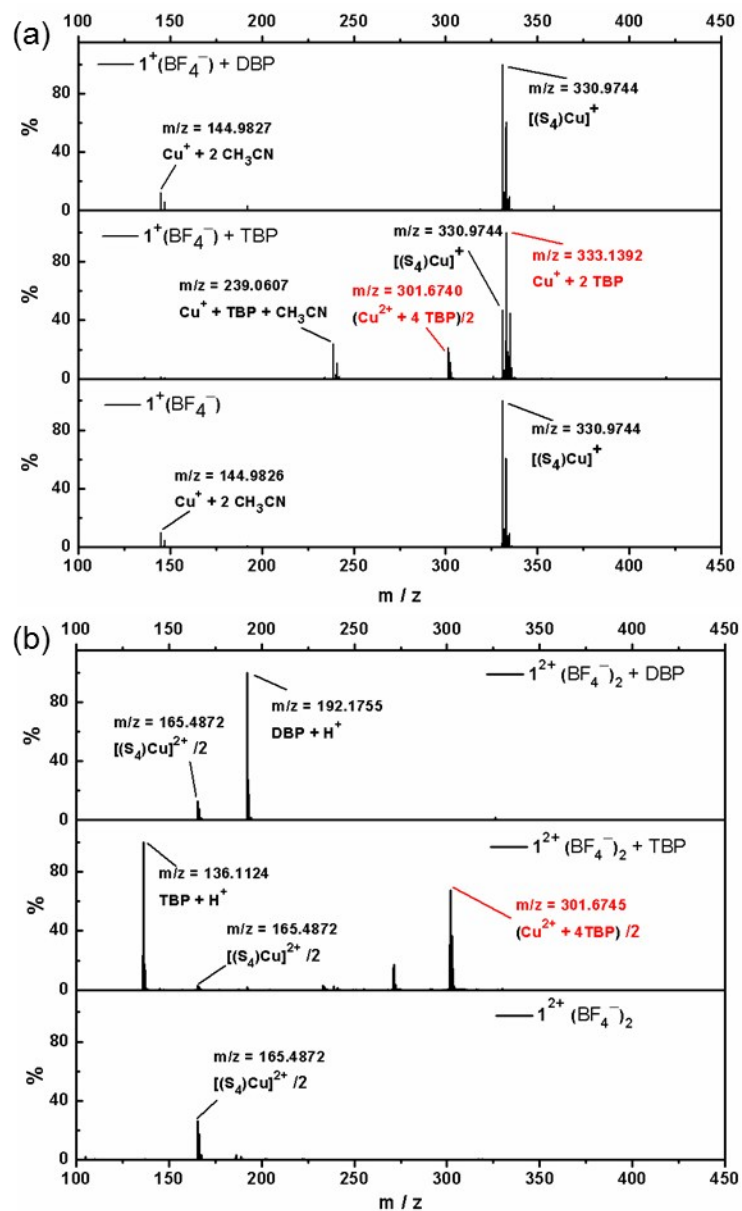

**Fig. S4** The high-resolution mass spectra of (a)  $1^+$  and (b)  $1^{2+}$  with 5 equivalent TBP and DBP in acetonitrile.

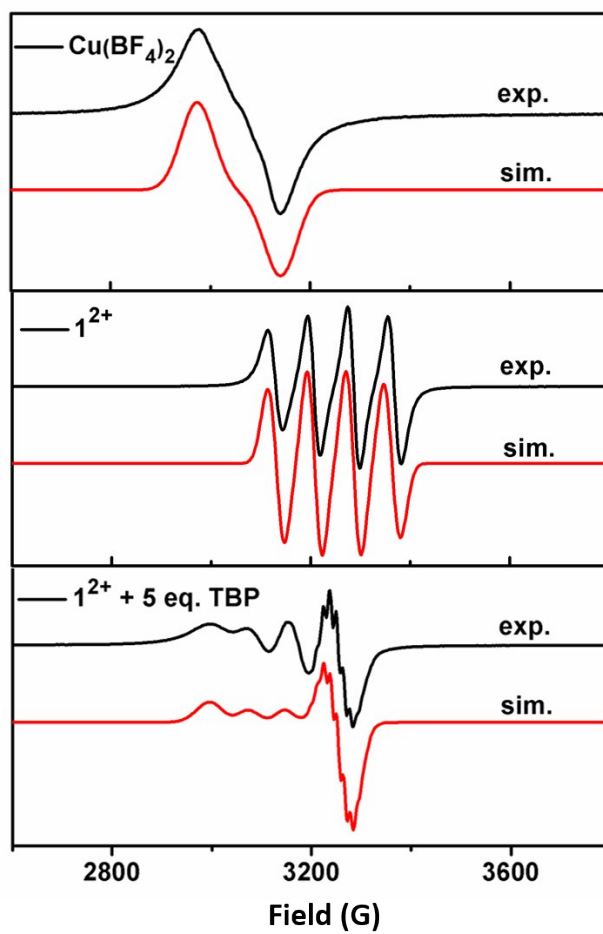

Fig. S5 Simulation of EPR spectra.

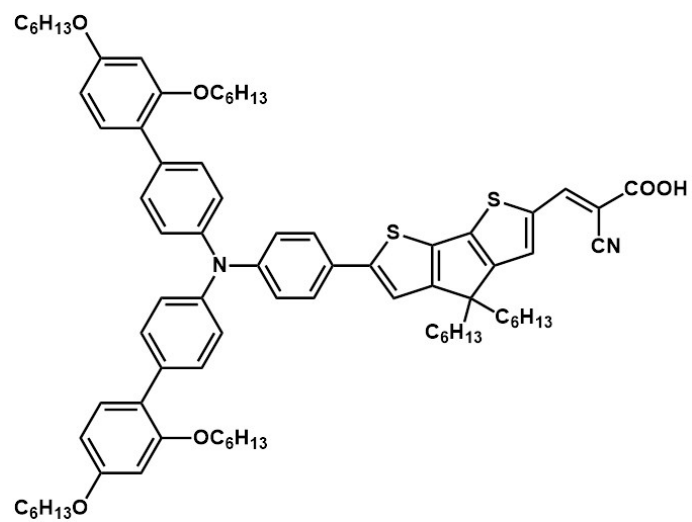

**Fig. S6** Molecular structure of dye Y123.

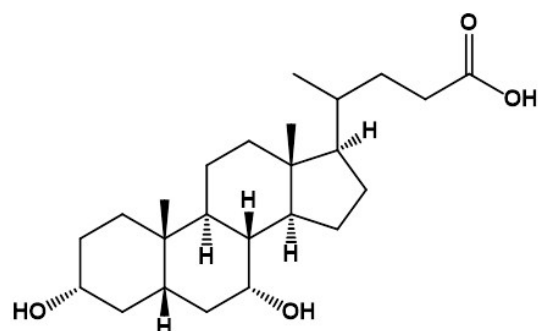

**Fig. S7** Molecular structure of CDCA.



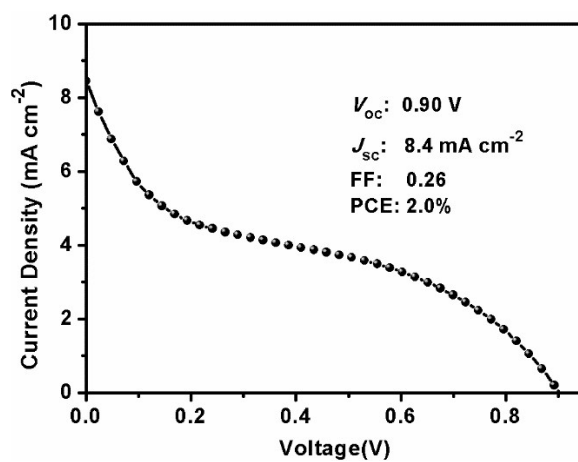

**Fig. S8**  $J$ - $V$  curve of the best DSC device containing the  $\mathbf{1}^{2+/+}$ -based electrolyte (0.1 M  $\mathbf{1}^+$ , 0.025 M  $\mathbf{1}^{2+}$ , 0.1 M Li-TFSI, 0.01 M CDCA, and 0.5 M TBP in acetonitrile) measured under one illumination (100 mW cm<sup>-2</sup>, AM 1.5G).

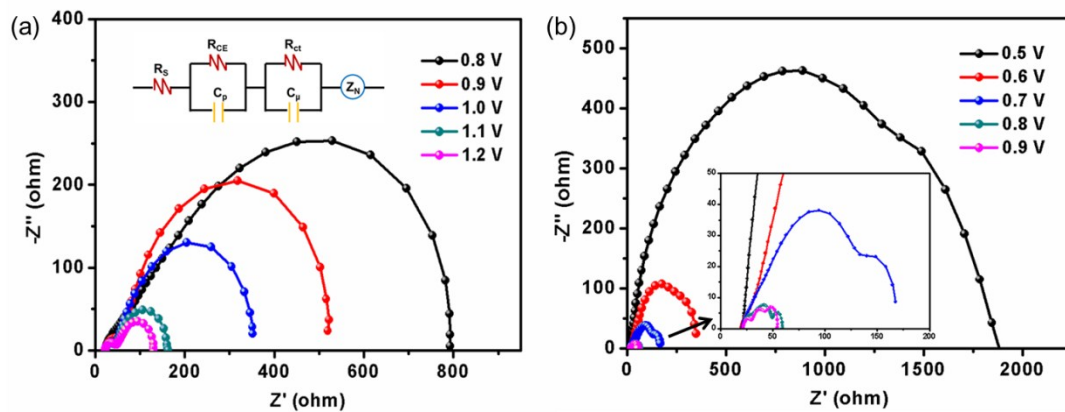

**Fig. S9** Nyquist plots for DSC devices based on (a) **E1** and (b) **E3** electrolytes measured in the dark at varied bias potentials.

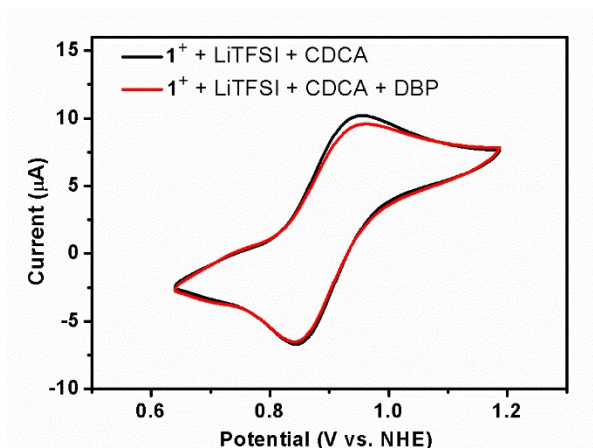

**Fig. S10** Cyclic voltammograms of  $1^+$  with different additives. The concentration of  $1^+$  is 0.1 mM in acetonitrile, and the concentrations of other components are based on their relative proportion in the electrolyte. The solution contains 0.1 M  $n\text{Bu}_4\text{NPF}_6$  as a supporting electrolyte, and the scan rate is  $50 \text{ mV s}^{-1}$ .

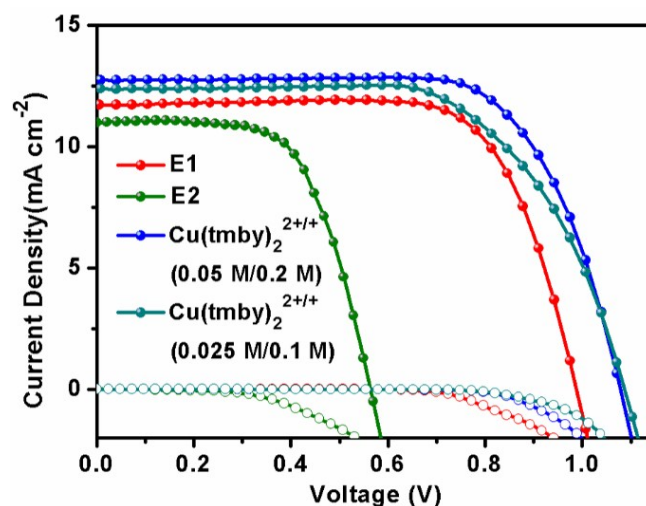

**Fig. S11**  $J$ - $V$  curves of DSC devices containing  $1^{2+/+}$ -based electrolyte (**E1**, 0.1 M  $1^+$ , 0.025 M  $1^{2+}$ , 0.5 M DBP, 0.1 M Li-TFSI, and 0.01 M CDCA in acetonitrile),  $2^{2+/+}$ -based electrolyte (**E2**, 0.2 M  $2^+$ , 0.05 M  $2^{2+}$ , 0.5 M DBP, 0.1 M Li-TFSI, and 0.01 M CDCA in acetonitrile), and  $\text{Cu}(\text{tmby})_2^{2+/+}$ -based electrolytes (varied concentrations of the copper species with 0.1 M Li-TFSI and 0.5 M TBP in acetonitrile), measured under illumination ( $100 \text{ mW cm}^{-2}$ , AM 1.5G, sphere mark) and in dark (open circle mark). CDCA (5 mM) was added in the dye Y123 solution used for all the devices.

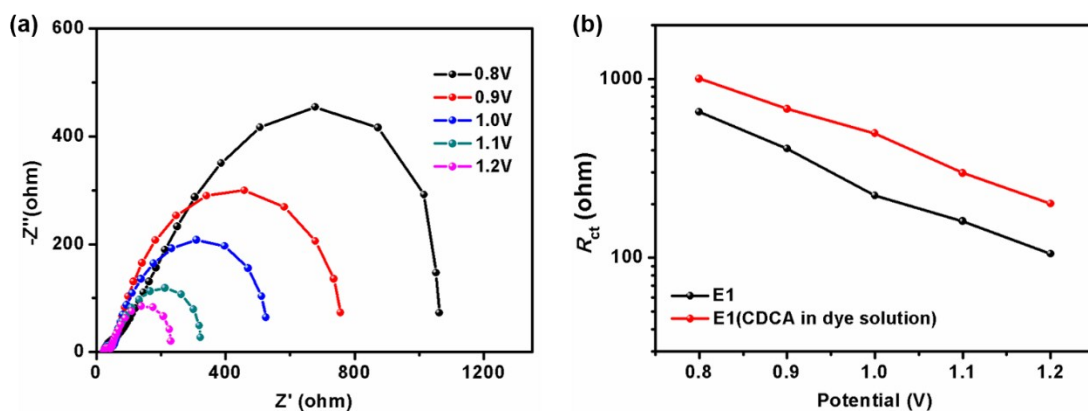

**Fig. S12** (a) Nyquist plots of DSC devices based on **E1** measured in the dark under varied bias potentials. CDCA (5 mM) was added in the dye Y123 solution. (b) The charge recombination resistances extracted from the EIS measurements at varied bias potentials.

**Table S1.** Crystallographic data and processing parameters for [(S<sub>4</sub>)Cu<sup>II</sup>(OH<sub>2</sub>)](BF<sub>4</sub>)<sub>2</sub> and [(N<sub>4</sub>)Cu<sup>II</sup>(OH<sub>2</sub>)](BF<sub>4</sub>)<sub>2</sub>.

| Complex                                                  | [(S <sub>4</sub> )Cu <sup>II</sup> (OH <sub>2</sub> )](BF <sub>4</sub> ) <sub>2</sub> | [(N <sub>4</sub> )Cu <sup>II</sup> (OH <sub>2</sub> )](BF <sub>4</sub> ) <sub>2</sub> |
|----------------------------------------------------------|---------------------------------------------------------------------------------------|---------------------------------------------------------------------------------------|
| Formula                                                  | C <sub>10</sub> H <sub>22</sub> S <sub>4</sub> OB <sub>2</sub> F <sub>8</sub> Cu      | C <sub>14</sub> H <sub>34</sub> N <sub>4</sub> OB <sub>2</sub> F <sub>8</sub> Cu      |
| Formula weight                                           | 522.67                                                                                | 511.21                                                                                |
| Crystal system                                           | Orthorhombic                                                                          | Triclinic                                                                             |
| Space group                                              | Ama2                                                                                  | <i>P</i> -1                                                                           |
| <i>Z</i>                                                 | 4                                                                                     | 2                                                                                     |
| <i>a</i> / Å                                             | 12.8692(17)                                                                           | 9.4885(3)                                                                             |
| <i>b</i> / Å                                             | 14.1500(18)                                                                           | 10.1789(3)                                                                            |
| <i>c</i> / Å                                             | 10.8460(14)                                                                           | 11.6397(4)                                                                            |
| <i>α</i> / deg                                           | 90.00                                                                                 | 85.237(2)                                                                             |
| <i>β</i> / deg                                           | 90.00                                                                                 | 74.9220(10)                                                                           |
| <i>γ</i> / deg                                           | 90.00                                                                                 | 77.7440(10)                                                                           |
| <i>V</i> / Å <sup>3</sup>                                | 1975.0(4)                                                                             | 1060.29(6)                                                                            |
| <i>D</i> <sub>calcd</sub> / g m <sup>-3</sup>            | 1.758                                                                                 | 1.504                                                                                 |
| $\mu$ / mm <sup>-1</sup>                                 | 1.599                                                                                 | 1.083                                                                                 |
| Crystal size / mm                                        | 0.21×0.20×0.11                                                                        | 0.14×0.12×0.11                                                                        |
| Range / deg                                              | 2.37 / 30.77                                                                          | 2.27 / 27.45                                                                          |
| Reflns collected/Indep.                                  | 1779 / 1751                                                                           | 3721 / 3520                                                                           |
| Parameters refined                                       | 129                                                                                   | 282                                                                                   |
| <i>F</i> (000)                                           | 1056                                                                                  | 510                                                                                   |
| GOF on <i>F</i> <sup>2</sup>                             | 1.049                                                                                 | 1.014                                                                                 |
| Final <i>R</i> <sub>1</sub> ( <i>I</i> > 2( <i>I</i> ))  | 0.0430                                                                                | 0.0384                                                                                |
| Final <i>wR</i> <sub>2</sub> ( <i>I</i> > 2( <i>I</i> )) | 0.1077                                                                                | 0.1001                                                                                |
| max. peak/hole / e Å <sup>-3</sup>                       | 0.961 / -0.882                                                                        | 0.807 / -0.874                                                                        |

$$R_1 = \sum ||F_o| - |F_c|| / \sum |F_o|, wR_2 = [\sum (|F_o|^2 - |F_c|^2)^2 / \sum (F_o^2)]^{1/2}$$

**Table S2.** Selected bond lengths (Å) and angles (deg) for  $[(S_4)Cu^{II}(OH_2)](BF_4)_2$  and  $[(N_4)Cu^{II}(OH_2)](BF_4)_2$ .

| $[(S_4)Cu^{II}(OH_2)](BF_4)_2$ |           | $[(N_4)Cu^{II}(OH_2)](BF_4)_2$ |           |
|--------------------------------|-----------|--------------------------------|-----------|
| Bond lengths (Å)               |           | Bond lengths (Å)               |           |
| Cu–S1                          | 2.313(15) | Cu–N1                          | 2.090(2)  |
| Cu–S2                          | 2.331(15) | Cu–N2                          | 2.096(2)  |
| Cu–S3                          | 2.331(15) | Cu–N3                          | 2.097(19) |
| Cu–S4                          | 2.313(15) | Cu–N4                          | 2.090(2)  |
| Bond angles (deg)              |           | Bond angles (deg)              |           |
| S1–Cu–S2                       | 88.05(5)  | N1–Cu–N2                       | 93.36(8)  |
| S1–Cu–S3                       | 169.33(6) | N1–Cu–N3                       | 152.88(8) |
| S1–Cu–S4                       | 92.74(8)  | N1–Cu–N4                       | 85.72(8)  |
| S2–Cu–S3                       | 89.24(9)  | N2–Cu–N3                       | 86.07(8)  |
| S2–Cu–S4                       | 169.33(6) | N2–Cu–N4                       | 176.79(7) |
| S3–Cu–S4                       | 88.05(5)  | N3–Cu–N4                       | 93.34(8)  |

**Table S3.** Summary of some representative photovoltaic performance of DSCs based on different copper redox couples.

| Redox Couples                                                                                            | $E_{1/2}$<br>(V vs. NHE) | $\lambda_{\max}$<br>(nm) | $V_{oc}$<br>(V) | $J_{sc}$<br>(mA cm <sup>-2</sup> ) | FF<br>(%) | PCE<br>(%) | Ref. |
|----------------------------------------------------------------------------------------------------------|--------------------------|--------------------------|-----------------|------------------------------------|-----------|------------|------|
| 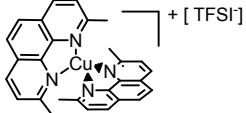 + [TFSI]               | 0.93                     | 457                      | 1.06            | 13.61                              | 69.2      | 10.3       | 1    |
|  + [TFSI]               | 0.97                     | 455                      | 1.07            | 14.15                              | 68.7      | 10.0       | 1    |
|  + [TFSI]               | 0.87                     | 451                      | 1.10            | 13.3                               | 78        | 11.6       | 2    |
|  + [PF <sub>6</sub> ] | 0.59                     | —                        | 0.895           | 14.1                               | 71.3      | 9.0        | 3    |
|  + [PF <sub>6</sub> ] | 0.75                     | 452                      | 0.61            | 6.3                                | 53        | 2.0        | 4    |
|  + [PF <sub>6</sub> ] | 0.70                     | 451                      | 0.81            | 5.9                                | 77        | 3.7        | 5    |
|  + [PF <sub>6</sub> ] | 0.62                     | 445                      | 0.72            | 9.3                                | 66        | 4.4        | 6    |



|                                                                                     |      |     |      |      |    |      |           |
|-------------------------------------------------------------------------------------|------|-----|------|------|----|------|-----------|
| 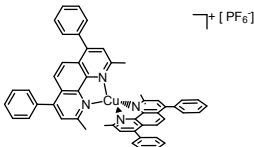   | 0.93 | —   | 0.71 | 1.1  | 49 | 0.4  | 7         |
|    | 0.83 | 310 | 0.88 | 4    | 28 | 0.98 | 8         |
|    | 0.53 | —   | 0.66 | 4.4  | 44 | 1.3  | 9         |
|    | 0.14 | —   | 0.57 | 0.48 | 43 | 0.12 | 9         |
|   | 0.65 | 455 | 0.87 | 11.1 | 62 | 6.0  | 10        |
|  | 0.65 | 437 | 0.88 | 8.0  | 69 | 4.9  | 10        |
| [Cu(N <sub>4</sub> ) <sup>+</sup> ]                                                 | 0.31 | 293 | 0.57 | 11.0 | 60 | 3.7  | This work |
| [Cu(S <sub>4</sub> ) <sup>+</sup> ]                                                 | 0.91 | 217 | 0.99 | 11.7 | 72 | 8.4  | This work |

**Table S4.** The fitting results of EIS parameters for DSCs based on electrolytes **E1** and

**E3.**

| Electrolytes | Potential (V) | $R_{ct}$ (Ohm) | $C_{\mu}$ ( $\mu$ F) | $\tau_e$ (ms) |
|--------------|---------------|----------------|----------------------|---------------|
| <b>E1</b>    | 0.8           | 653.2          | 43.2                 | 28.2          |
|              | 0.9           | 408.0          | 49.1                 | 20.0          |
|              | 1.0           | 223.1          | 75.0                 | 16.7          |
|              | 1.1           | 160.0          | 99.7                 | 15.9          |
|              | 1.2           | 105.3          | 146.4                | 15.4          |
| <b>E3</b>    | 0.5           | 1627           | 2.6                  | 4.23          |
|              | 0.6           | 380.6          | 4.0                  | 1.52          |
|              | 0.7           | 107.4          | 8.1                  | 0.87          |
|              | 0.8           | 23.4           | 51.7                 | 1.21          |
|              | 0.9           | 10.1           | 74.5                 | 0.75          |

**Table S5.** Photovoltaic parameters of the best DSC devices based on different electrolytes measured under  $100 \text{ mW cm}^{-2}$  irradiation (AM 1.5G). CDCA (5 mM) was added in the dye Y123 solution

| Electrolytes                                      | $V_{oc}$ (V) | $J_{sc}$ ( $\text{mA cm}^{-2}$ ) | FF   | PCE (%) |
|---------------------------------------------------|--------------|----------------------------------|------|---------|
| $\text{Cu}(\text{tmby})_2^{2+/+}$ (0.025 M/0.1 M) | 1.09         | 12.4                             | 0.65 | 8.7     |
| $\text{Cu}(\text{tmby})_2^{2+/+}$ (0.05 M/0.2 M)  | 1.08         | 12.7                             | 0.71 | 9.7     |

## References

- 1 Y. Saygili, M. Soderberg, N. Pellet, F. Giordano, Y. Cao, A. B. Munoz-Garcia, S. M. Zakeeruddin, N. Vlachopoulos, M. Pavone, G. Boschloo, L. Kavan, J. E. Moser, M. Grätzel, A. Hagfeldt and M. Freitag, *J. Am. Chem. Soc.*, 2016, **138**, 15087.
- 2 W. Zhang, Y. Wu, H. W. Bahng, Y. Cao, C. Yi, Y. Saygili, J. Luo, Y. Liu, K. Kavan, J-E. Moser, A. Hagfeldt, H. Tian, S. M. Zakeeruddin, W.-H. Zhu and M. Grätzel, *Energy Environ. Sci.*, 2018, **11**, 1779.
- 3 J. Cong, D. Kinschel, Q. Daniel, M. Safdari, E. Gabrielsson, H. Chen, P. H. Svensson, L. Sun and L. Kloo, *J. Mater. Chem. A*, 2016, **4**, 14550
- 4 C. Dragonetti, M. Magni, A. Colombo, F. Melchiorre, P. Biagini and D. Roberto, *ACS Appl. Energy Mater.*, 2018, **1**, 751.
- 5 A. Colombo, G. Di Carlo, C. Dragonetti, M. Magni, A. Orbelli Biroli, M. Pizzotti, D. Roberto, F. Tessore, E. Benazzi, C. A. Bignozzi, L. Casarin and S. Caramori, *Inorg. Chem.*, 2017, **56**, 14189.
- 6 M. Magni, R. Giannuzzi, A. Colombo, M. P. Cipolla, C. Dragonetti, S. Caramori, S. Carli, R. Grisorio, G. P. Suranna, C. A. Bignozzi, D. Roberto and M. Manca, *Inorg. Chem.*, 2016, **55**, 5245.
- 7 A. Colombo, C. Dragonetti, M. Magni, D. Roberto, F. Demartin, S. Caramori and C. Bignozzi, *ACS Appl. Mater. Interfaces*, 2014, **6**, 13945.
- 8 W. L. Hoffeditz, M. J. Katz, P. Deria, G. E. Cutsail Iii, M. J. Pellin, O. K. Farha and J. T. Hupp, *J. Phys. Chem. C*, 2016, **120**, 3731.
- 9 S. Hattori, Y. Wada, S. Yanagida and S. Fukuzumi, *J. Am. Chem. Soc.*, 2005, **127**, 9648.

10 E. Benazzi, M. Magni, A. Colombo, C. Dragonetti, S. Caramori, C. A. Bignozzi, R. Grisorio, G. P. Suranna, M. P. Cipolla, M. Manca and D. Roberto, *Electrochim. Acta*, 2018, **271**, 180.
